# Supplementary material
Source: HighWire-hosted journal article supplement (https://jitc.bmj.com/content/10/7/e004610)
Supplement: inline-supplementary-material-1 [file inline-supplementary-material-1.pdf]

## Supplementary Data

Supplementary Table 1: Sites of metastases at the start of PD1 +/- IPI stratified by treatment type.

| Characteristics                         | Anti-PD-1<br>monotherapy<br>(N = 115) | Anti-PD-1 +<br>anti-CTLA-4<br>(N = 85) | P-value       |
|-----------------------------------------|---------------------------------------|----------------------------------------|---------------|
| <b>Brain Metastasis (n, %)</b>          |                                       |                                        |               |
| No                                      | 71 (61.7%)                            | 30 (35.3%)                             | <b>0.0004</b> |
| Yes                                     | 44 (38.3%)                            | 55 (64.7%)                             |               |
| <b>Lung Metastasis (n, %)</b>           |                                       |                                        |               |
| No                                      | 50 (43.5%)                            | 39 (45.9%)                             | 0.8460        |
| Yes                                     | 65 (56.5%)                            | 46 (54.1%)                             |               |
| <b>Liver Metastasis (n, %)</b>          |                                       |                                        |               |
| No                                      | 79 (68.7%)                            | 57 (67.1%)                             | 0.9267        |
| Yes                                     | 36 (31.3%)                            | 28 (32.9%)                             |               |
| <b>GI<sup>1</sup> Metastasis (n, %)</b> |                                       |                                        |               |
| No                                      | 99 (86.1%)                            | 70 (82.4%)                             | 0.6005        |
| Yes                                     | 16 (13.9%)                            | 15 (17.6%)                             |               |
| <b>Bone Metastasis (n, %)</b>           |                                       |                                        |               |
| No                                      | 80 (69.6%)                            | 57 (67.1%)                             | 0.8233        |
| Yes                                     | 35 (30.4%)                            | 28 (32.9%)                             |               |
| <b>Adrenal Metastasis (n, %)</b>        |                                       |                                        |               |
| No                                      | 97 (84.3%)                            | 72 (84.7%)                             | 1.0000        |
| Yes                                     | 18 (15.7%)                            | 13 (15.3%)                             |               |
| <b>Soft tissue Metastasis (n, %)</b>    |                                       |                                        |               |
| No                                      | 73 (63.5%)                            | 65 (76.5%)                             | 0.0704        |
| Yes                                     | 42 (36.5%)                            | 20 (23.5%)                             |               |
| <b>LN<sup>2</sup> Metastasis (n, %)</b> |                                       |                                        |               |
| No                                      | 32 (27.8%)                            | 40 (47.1%)                             | <b>0.0080</b> |
| Yes                                     | 83 (72.2%)                            | 45 (52.9%)                             |               |
| <b>Spleen Metastasis (n, %)</b>         |                                       |                                        |               |

<sup>1</sup> GI, gastrointestinal.<sup>2</sup> LN, Lymph node.

| <b>Characteristics</b>                | <b>Anti-PD-1<br/>monotherapy<br/>(N = 115)</b> | <b>Anti-PD-1 +<br/>anti-CTLA-4<br/>(N = 85)</b> | <b>P-value</b> |
|---------------------------------------|------------------------------------------------|-------------------------------------------------|----------------|
| <b>No</b>                             | 105 (91.3%)                                    | 79 (92.9%)                                      | 0.8743         |
| <b>Yes</b>                            | 10 (8.7%)                                      | 6 (7.1%)                                        |                |
| <b>Subcutaneous Metastasis (n, %)</b> |                                                |                                                 |                |
| <b>No</b>                             | 76 (66.1%)                                     | 69 (81.2%)                                      | <b>0.0276</b>  |
| <b>Yes</b>                            | 39 (33.9%)                                     | 16 (18.8%)                                      |                |

**Supplementary Table 2.** Univariable and multivariable logistic regression of Objective response.

| Variable                                                | Univariate        |         | Multivariable (†) |         |
|---------------------------------------------------------|-------------------|---------|-------------------|---------|
|                                                         | OR (95% CI)       | P-value | OR (95% CI)       | P-value |
| <b>Sex</b>                                              |                   |         |                   |         |
| Female                                                  | 1                 | 0.8293  |                   |         |
| Male                                                    | 1.07 (0.57, 2.00) |         |                   |         |
| <b>BRAF mutation status</b>                             |                   |         |                   |         |
| V600E                                                   | 1                 | 1.0000  |                   |         |
| Other                                                   | 1.00 (0.51, 1.95) |         |                   |         |
| <b>ECOG PS<sup>3</sup> at BRAF/MEKi start</b>           |                   |         |                   |         |
| 0                                                       | 1                 | 0.3006  |                   |         |
| ≥1                                                      | 0.73 (0.40, 1.33) |         |                   |         |
| <b>AJCC<sup>4</sup> staging at BRAF/MEKi start</b>      |                   |         |                   |         |
| III/M1a/M1b                                             | 1                 | 0.0667  |                   |         |
| M1c/M1d                                                 | 0.55 (0.29, 1.04) |         |                   |         |
| <b>LDH<sup>5</sup> at BRAF/MEKi start</b>               |                   |         |                   |         |
| UNL                                                     | 1                 | 0.0918  |                   |         |
| >UNL                                                    | 0.58 (0.31, 1.09) |         |                   |         |
| <b>Overall Best Response<sup>6</sup> with BRAF/MEKi</b> |                   |         |                   |         |
| CR/PR                                                   | 1                 | 0.8070  |                   |         |
| SD/PD                                                   | 1.09 (0.54, 2.21) |         |                   |         |
| <b>Number of progressive lesions after BRAF/MEKi</b>    |                   |         |                   |         |
| 1                                                       | 1                 | 0.0770  |                   |         |

<sup>3</sup> ECOG PS, Eastern Cooperative Oncology Group performance status.

<sup>4</sup> AJCC, American Joint Committee on Cancer.

<sup>5</sup> LDH, Lactate dehydrogenase.

<sup>6</sup> Overall Best Response: CR, complete response; PR, partial response; SD, stable disease; PD, progressive disease.

| Variable                                                   | Univariate        |               | Multivariable (†) |               |
|------------------------------------------------------------|-------------------|---------------|-------------------|---------------|
|                                                            | OR (95% CI)       | P-value       | OR (95% CI)       | P-value       |
| 2                                                          | 0.42 (0.16, 1.10) |               |                   |               |
| ≥3                                                         | 0.47 (0.23, 0.96) |               |                   |               |
| <b>Progressing brain metastases at PD1+/- IPI start</b>    |                   |               |                   |               |
| No                                                         | 1                 | <b>0.0376</b> | 1                 | 0.0789        |
| Yes                                                        | 0.50 (0.26, 0.96) |               | 0.53 (0.27, 1.08) |               |
| <b>Progressing liver metastases at PD1+/- IPI start</b>    |                   |               |                   |               |
| No                                                         | 1                 | 0.5001        |                   |               |
| Yes                                                        | 0.72 (0.28, 1.85) |               |                   |               |
| <b>Any steroids to control symptoms due to progression</b> |                   |               |                   |               |
| No                                                         | 1                 | 0.1896        |                   |               |
| Yes                                                        | 0.42 (0.11, 1.54) |               |                   |               |
| <b>Duration of BRAF/MEKi treatment (months)</b>            |                   |               |                   |               |
|                                                            | 1.01 (0.99, 1.03) | 0.3849        |                   |               |
| <b>Reason to BRAF/MEKi cessation</b>                       |                   |               |                   |               |
| Progressive disease                                        | 1                 | 0.0589        |                   |               |
| Elective                                                   | 1.91 (0.98, 3.72) |               |                   |               |
| <b>Interval between BRAF/MEKi and PD1+/- IPI (weeks)</b>   |                   |               |                   |               |
|                                                            | 1.01 (1.00, 1.02) | 0.1776        |                   |               |
| <b>Age at PD1+/-IPI start (years)</b>                      |                   |               |                   |               |
|                                                            | 0.99 (0.97, 1.01) | 0.3904        |                   |               |
| <b>ECOG at PD1+/-IPI start</b>                             |                   |               |                   |               |
| 0                                                          | 1                 | <b>0.0021</b> | 1                 | <b>0.0056</b> |
| ≥1                                                         | 0.39 (0.21, 0.71) |               | 0.38 (0.19, 0.75) |               |
| <b>AJCC Staging at PD1+/-IPI start</b>                     |                   |               |                   |               |
| III/M1a/M1b                                                | 1                 | 0.1652        |                   |               |

| Variable                                         | Univariate        |               | Multivariable (†) |         |
|--------------------------------------------------|-------------------|---------------|-------------------|---------|
|                                                  | OR (95% CI)       | P-value       | OR (95% CI)       | P-value |
| <b>M1c/M1d</b>                                   | 0.60 (0.29, 1.24) |               |                   |         |
| <b>Brain metastasis at PD1+/-IPI start</b>       |                   |               |                   |         |
| No                                               | 1                 | 0.1725        |                   |         |
| Yes                                              | 0.67 (0.37, 1.19) |               |                   |         |
| <b>Lung metastasis at PD1+/-IPI start</b>        |                   |               |                   |         |
| No                                               | 1                 | 0.3680        |                   |         |
| Yes                                              | 1.31 (0.73, 2.35) |               |                   |         |
| <b>Liver metastasis at PD1+/-IPI start</b>       |                   |               |                   |         |
| No                                               | 1                 | 0.0584        |                   |         |
| Yes                                              | 0.53 (0.28, 1.02) |               |                   |         |
| <b>GI metastasis at PD1+/-IPI start</b>          |                   |               |                   |         |
| No                                               | 1                 | 0.7325        |                   |         |
| Yes                                              | 1.15 (0.52, 2.52) |               |                   |         |
| <b>Bone metastasis at PD1+/-IPI start</b>        |                   |               |                   |         |
| No                                               | 1                 | <b>0.0359</b> | 1                 | 0.0791  |
| Yes                                              | 0.49 (0.25, 0.95) |               | 0.49 (0.22, 1.09) |         |
| <b>Adrenal metastasis at PD1+/-IPI start</b>     |                   |               |                   |         |
| No                                               | 1                 | 0.2026        |                   |         |
| Yes                                              | 0.57 (0.24, 1.35) |               |                   |         |
| <b>Soft tissue metastasis at PD1+/-IPI start</b> |                   |               |                   |         |
| No                                               | 1                 | 0.6743        |                   |         |
| Yes                                              | 0.87 (0.47, 1.64) |               |                   |         |
| <b>LN metastasis at PD1+/-IPI start</b>          |                   |               |                   |         |
| No                                               | 1                 | 0.3708        |                   |         |
| Yes                                              | 1.32 (0.72, 2.43) |               |                   |         |
| <b>Spleen metastasis at PD1+/-IPI start</b>      |                   |               |                   |         |
| No                                               | 1                 | 0.3449        |                   |         |
| Yes                                              | 0.57 (0.18, 1.83) |               |                   |         |

| Variable                                          | Univariate        |         | Multivariable (†) |         |
|---------------------------------------------------|-------------------|---------|-------------------|---------|
|                                                   | OR (95% CI)       | P-value | OR (95% CI)       | P-value |
| <b>Subcutaneous metastasis at PD1+/-IPI start</b> |                   |         |                   |         |
| No                                                | 1                 | 0.1673  |                   |         |
| Yes                                               | 1.56 (0.83, 2.95) |         |                   |         |
| <b>LDH at PD1+/-IPI start</b>                     |                   |         |                   |         |
| UNL                                               | 1                 | 0.1145  |                   |         |
| >UNL                                              | 0.62 (0.35, 1.12) |         |                   |         |
| <b>Treatment</b>                                  |                   |         |                   |         |
| PD1                                               | 1                 | 0.4748  |                   |         |
| IPI+PD1                                           | 1.24 (0.69, 2.21) |         |                   |         |

**Supplementary Table 3.** Univariable and multivariable Cox regression of Progression-free Survival.

| Variable                                               | Univariable       |               | Multivariable (†) |         |
|--------------------------------------------------------|-------------------|---------------|-------------------|---------|
|                                                        | HR (95% CI)       | P-value       | HR (95% CI)       | P-value |
| <b>Sex</b>                                             |                   |               |                   |         |
| Female                                                 | 1                 | 0.7038        |                   |         |
| Male                                                   | 0.94 (0.67, 1.31) |               |                   |         |
| <b>BRAF mutation status</b>                            |                   |               |                   |         |
| V600E                                                  | 1                 | 0.9877        |                   |         |
| Other                                                  | 1.00 (0.70, 1.43) |               |                   |         |
| <b>ECOG PS at BRAF/MEKi start</b>                      |                   |               |                   |         |
| 0                                                      | 1                 | 0.7866        |                   |         |
| ≥1                                                     | 1.04 (0.76, 1.44) |               |                   |         |
| <b>AJCC staging at BRAF/MEKi start</b>                 |                   |               |                   |         |
| III/M1a/M1b                                            | 1                 | <b>0.0222</b> | 1                 | 0.5735  |
| M1c/M1d                                                | 1.53 (1.06, 2.19) |               | 1.16 (0.69, 1.97) |         |
| <b>LDH at BRAF/MEKi start</b>                          |                   |               |                   |         |
| UNL                                                    | 1                 | 0.0608        |                   |         |
| >UNL                                                   | 1.36 (0.99, 1.89) |               |                   |         |
| <b>Overall Best Response with BRAF/MEKi</b>            |                   |               |                   |         |
| CR/PR                                                  | 1                 | 0.8247        |                   |         |
| SD/PD                                                  | 0.96 (0.66, 1.39) |               |                   |         |
| <b>Number of progressive lesions after BRAF/MEKi</b>   |                   |               |                   |         |
| 1                                                      | 1                 | 0.2781        |                   |         |
| 2                                                      | 1.28 (0.79, 2.08) |               |                   |         |
| ≥3                                                     | 1.37 (0.93, 2.03) |               |                   |         |
| <b>Progressing brain metastases at PD1+/-IPI start</b> |                   |               |                   |         |

| Variable                                                   | Univariable       |               | Multivariable (†) |               |
|------------------------------------------------------------|-------------------|---------------|-------------------|---------------|
|                                                            | HR (95% CI)       | P-value       | HR (95% CI)       | P-value       |
| No                                                         | 1                 | <b>0.0017</b> | 1                 | 0.9434        |
| Yes                                                        | 1.71 (1.22, 2.38) |               | 1.03 (0.49, 2.15) |               |
| <b>Progressing liver metastases at PD1+/- IPI start</b>    |                   |               |                   |               |
| No                                                         | 1                 | 0.4926        |                   |               |
| Yes                                                        | 1.17 (0.74, 1.85) |               |                   |               |
| <b>Any steroids to control symptoms due to progression</b> |                   |               |                   |               |
| No                                                         | 1                 | 0.4835        |                   |               |
| Yes                                                        | 1.22 (0.70, 2.11) |               |                   |               |
| <b>Duration of BRAF/MEKi treatment (months)</b>            | 1.00 (0.99, 1.01) | 0.7568        |                   |               |
| <b>Reason to BRAF/MEKi cessation</b>                       |                   |               |                   |               |
| Progressive disease                                        | 1                 | <b>0.0021</b> | 1                 | 0.4002        |
| Elective                                                   | 0.52 (0.34, 0.79) |               | 0.75 (0.39, 1.46) |               |
| <b>Interval between BRAF/MEKi and PD1+/-IPI (weeks)</b>    | 0.99 (0.99, 1.00) | 0.1494        |                   |               |
| <b>Age at PD1+/-IPI start (years)</b>                      | 1.00 (0.99, 1.01) | 0.4287        |                   |               |
| <b>ECOG at PD1+/-IPI start</b>                             |                   |               |                   |               |
| 0                                                          | 1                 | <b>0.0011</b> | 1                 | <b>0.0017</b> |
| ≥1                                                         | 1.73 (1.24, 2.40) |               | 1.78 (1.24, 2.55) |               |
| <b>AJCC Staging v8 at PD1+/-IPI start</b>                  |                   |               |                   |               |
| III/M1a/M1b                                                | 1                 | <b>0.0257</b> | 1                 | 0.2110        |
| M1c/M1d                                                    | 1.61 (1.06, 2.46) |               | 0.63 (0.34, 1.27) |               |
| <b>Brain metastasis at PD1+/-IPI start</b>                 |                   |               |                   |               |
| No                                                         | 1                 | <b>0.0072</b> | 1                 | 0.1261        |
| Yes                                                        | 1.53 (1.12, 2.09) |               | 1.84 (0.84, 4.00) |               |
| <b>Lung metastasis at PD1+/-IPI start</b>                  |                   |               |                   |               |
| No                                                         | 1                 | 0.4023        |                   |               |
| Yes                                                        | 0.88 (0.64, 1.20) |               |                   |               |



| Variable                                          | Univariable       |               | Multivariable (†) |               |
|---------------------------------------------------|-------------------|---------------|-------------------|---------------|
|                                                   | HR (95% CI)       | P-value       | HR (95% CI)       | P-value       |
| <b>Liver metastasis at PD1+/-IPI start</b>        |                   |               |                   |               |
| No                                                | 1                 | <b>0.0079</b> | 1                 | <b>0.0368</b> |
| Yes                                               | 1.56 (1.12, 2.16) |               | 1.56 (1.03, 2.35) |               |
| <b>GI metastasis at PD1+/-IPI start</b>           |                   |               |                   |               |
| No                                                | 1                 | 0.6263        |                   |               |
| Yes                                               | 1.11 (0.73, 1.70) |               |                   |               |
| <b>Bone metastasis at PD1+/-IPI start</b>         |                   |               |                   |               |
| No                                                | 1                 | <b>0.0117</b> | 1                 | 0.1062        |
| Yes                                               | 1.52 (1.10, 2.11) |               | 1.41 (0.93, 2.14) |               |
| <b>Adrenal metastasis at PD1+/-IPI start</b>      |                   |               |                   |               |
| No                                                | 1                 | 0.1365        |                   |               |
| Yes                                               | 1.38 (0.90, 2.10) |               |                   |               |
| <b>Soft tissue metastasis at PD1+/-IPI start</b>  |                   |               |                   |               |
| No                                                | 1                 | 0.9884        |                   |               |
| Yes                                               | 1.00 (0.72, 1.40) |               |                   |               |
| <b>LN metastasis at PD1+/-IPI start</b>           |                   |               |                   |               |
| No                                                | 1                 | 0.8364        |                   |               |
| Yes                                               | 0.97 (0.70, 1.34) |               |                   |               |
| <b>Spleen metastasis at PD1+/-IPI start</b>       |                   |               |                   |               |
| No                                                | 1                 | 0.1608        |                   |               |
| Yes                                               | 1.46 (0.86, 2.49) |               |                   |               |
| <b>Subcutaneous metastasis at PD1+/-IPI start</b> |                   |               |                   |               |
| No                                                | 1                 | 0.5355        |                   |               |
| Yes                                               | 0.90 (0.63, 1.27) |               |                   |               |
| <b>LDH at PD1+/-IPI start</b>                     |                   |               |                   |               |
| UNL                                               | 1                 | 0.1311        |                   |               |
| >UNL                                              | 1.27 (0.93, 1.74) |               |                   |               |

| Variable         | Univariable       |         | Multivariable (†) |         |
|------------------|-------------------|---------|-------------------|---------|
|                  | HR (95% CI)       | P-value | HR (95% CI)       | P-value |
| <b>Treatment</b> |                   |         |                   |         |
| <b>PD1</b>       | 1                 | 0.6951  |                   |         |
| <b>IPI+PD1</b>   | 0.94 (0.69, 1.29) |         |                   |         |

**Supplementary Table 4.** Univariable and multivariable Cox regression of Overall Survival.

| Variable                                               | Univariable       |               | Multivariable (†) |         |
|--------------------------------------------------------|-------------------|---------------|-------------------|---------|
|                                                        | HR                | P-value       | HR                | P-value |
| <b>Sex</b>                                             |                   |               |                   |         |
| Female                                                 | 1                 | 0.6790        |                   |         |
| Male                                                   | 1.09 (0.73, 1.61) |               |                   |         |
| <b>BRAF mutation status</b>                            |                   |               |                   |         |
| V600E                                                  | 1                 | 0.7083        |                   |         |
| Other                                                  | 1.08 (0.72, 1.63) |               |                   |         |
| <b>ECOG PS at BRAF/MEKi start</b>                      |                   |               |                   |         |
| 0                                                      | 1                 | 0.1297        |                   |         |
| ≥1                                                     | 1.33 (0.92, 1.92) |               |                   |         |
| <b>AJCC staging v8 at BRAF/MEKi start</b>              |                   |               |                   |         |
| III/M1a/M1b                                            | 1                 | 0.0592        |                   |         |
| M1c/M1d                                                | 1.52 (0.98, 2.36) |               |                   |         |
| <b>LDH at BRAF/MEKi start</b>                          |                   |               |                   |         |
| UNL                                                    | 1                 | <b>0.0197</b> | 1                 | 0.0915  |
| >UNL                                                   | 1.56 (1.07, 2.27) |               | 1.41 (0.95, 2.10) |         |
| <b>Overall Best Response with BRAF/MEKi</b>            |                   |               |                   |         |
| CR/PR                                                  | 1                 | 0.8720        |                   |         |
| SD/PD                                                  | 1.04 (0.68, 1.59) |               |                   |         |
| <b>Number of progressive lesions after BRAF/MEKi</b>   |                   |               |                   |         |
| 1                                                      | 1                 | 0.2683        |                   |         |
| 2                                                      | 0.87 (0.47, 1.58) |               |                   |         |
| ≥3                                                     | 1.29 (0.82, 2.02) |               |                   |         |
| <b>Progressing brain metastases at PD1+/-IPI start</b> |                   |               |                   |         |

| Variable                                                   | Univariable       |                  | Multivariable (†) |                  |
|------------------------------------------------------------|-------------------|------------------|-------------------|------------------|
|                                                            | HR                | P-value          | HR                | P-value          |
| No                                                         | 1                 | 0.2102           |                   |                  |
| Yes                                                        | 1.28 (0.87, 1.88) |                  |                   |                  |
| <b>Progressing liver metastases at PD1+/-IPI start</b>     |                   |                  |                   |                  |
| No                                                         | 1                 | 0.1360           |                   |                  |
| Yes                                                        | 1.47 (0.89, 2.45) |                  |                   |                  |
| <b>Any steroids to control symptoms due to progression</b> |                   |                  |                   |                  |
| No                                                         | 1                 | 0.5720           |                   |                  |
| Yes                                                        | 1.21 (0.63, 2.32) |                  |                   |                  |
| <b>Duration of BRAF/MEKi treatment (months)</b>            | 0.98 (0.96, 1.00) | 0.0536           |                   |                  |
| <b>Reason to BRAF/MEKi cessation</b>                       |                   |                  |                   |                  |
| Progressive disease                                        | 1                 | <b>0.0058</b>    | 1                 | <b>0.0105</b>    |
| Elective                                                   | 0.49 (0.30, 0.81) |                  | 0.50 (0.30, 0.85) |                  |
| <b>Interval between BRAF/MEKi and PD1+/-IPI (weeks)</b>    | 1.00 (0.99, 1.00) | 0.2727           |                   |                  |
| <b>Age at PD1+/-IPI start (years)</b>                      | 1.01 (1.00, 1.02) | 0.1263           |                   |                  |
| <b>ECOG at PD1+/-IPI start</b>                             |                   |                  |                   |                  |
| 0                                                          | 1                 | <b>&lt;.0001</b> | 1                 | <b>&lt;.0001</b> |
| ≥1                                                         | 2.85 (1.88, 4.34) |                  | 3.10 (1.99, 4.82) |                  |
| <b>AJCC Staging v8 at PD1+/-IPI start</b>                  |                   |                  |                   |                  |
| III/M1a/M1b                                                | 1                 | 0.0799           |                   |                  |
| M1c/M1d                                                    | 1.58 (0.95, 2.65) |                  |                   |                  |
| <b>Brain metastasis at PD1+/-IPI start</b>                 |                   |                  |                   |                  |
| No                                                         | 1                 | 0.2017           |                   |                  |
| Yes                                                        | 1.27 (0.88, 1.83) |                  |                   |                  |
| <b>Lung metastasis at PD1+/-IPI start</b>                  |                   |                  |                   |                  |
| No                                                         | 1                 | 0.9416           |                   |                  |
| Yes                                                        | 0.99 (0.68, 1.42) |                  |                   |                  |

| Variable                                          | Univariable       |               | Multivariable (†) |               |
|---------------------------------------------------|-------------------|---------------|-------------------|---------------|
|                                                   | HR                | P-value       | HR                | P-value       |
| <b>Liver metastasis at PD1+/-IPI start</b>        |                   |               |                   |               |
| No                                                | 1                 | <b>0.0041</b> | 1                 | <b>0.0032</b> |
| Yes                                               | 1.73 (1.19, 2.52) |               | 2.04 (1.27, 3.28) |               |
| <b>GI metastasis at PD1+/-IPI start</b>           |                   |               |                   |               |
| No                                                | 1                 | 0.9150        |                   |               |
| Yes                                               | 0.97 (0.58, 1.63) |               |                   |               |
| <b>Bone metastasis at PD1+/-IPI start</b>         |                   |               |                   |               |
| No                                                | 1                 | <b>0.0015</b> | 1                 | 0.5803        |
| Yes                                               | 1.83 (1.26, 2.66) |               | 1.14 (0.71, 1.85) |               |
| <b>Adrenal metastasis at PD1+/-IPI start</b>      |                   |               |                   |               |
| No                                                | 1                 | 0.7081        |                   |               |
| Yes                                               | 1.10 (0.67, 1.80) |               |                   |               |
| <b>Soft tissue metastasis at PD1+/-IPI start</b>  |                   |               |                   |               |
| No                                                | 1                 | 0.9568        |                   |               |
| Yes                                               | 1.01 (0.68, 1.49) |               |                   |               |
| <b>LN metastasis at PD1+/-IPI start</b>           |                   |               |                   |               |
| No                                                | 1                 | 0.1957        |                   |               |
| Yes                                               | 1.30 (0.87, 1.93) |               |                   |               |
| <b>Spleen metastasis at PD1+/-IPI start</b>       |                   |               |                   |               |
| No                                                | 1                 | 0.1213        |                   |               |
| Yes                                               | 1.61 (0.88, 2.92) |               |                   |               |
| <b>Subcutaneous metastasis at PD1+/-IPI start</b> |                   |               |                   |               |
| No                                                | 1                 | 0.6495        |                   |               |
| Yes                                               | 1.10 (0.73, 1.64) |               |                   |               |
| <b>LDH at PD1+/-IPI start</b>                     |                   |               |                   |               |
| UNL                                               | 1                 | <b>0.0034</b> | 1                 | 0.1518        |
| >UNL                                              | 1.96 (1.25, 3.09) |               | 1.35 (0.89, 2.05) |               |

| Variable         | Univariable       |         | Multivariable (†) |         |
|------------------|-------------------|---------|-------------------|---------|
|                  | HR                | P-value | HR                | P-value |
| <b>Treatment</b> |                   |         |                   |         |
| <b>PD1</b>       | 1                 | 0.2603  |                   |         |
| <b>IPI+PD1</b>   | 0.81 (0.55, 1.17) |         |                   |         |

**Supplementary Table 5.** Univariate and Multivariable Logistic Regression to identify the subgroup of patient with progressive disease as best response to anti-PD1+/-anti-CTLA-4 after BRAF/MEKi.

| Variable                                                | Univariate        |         | Multivariable     |         | Predictive Model  |         |
|---------------------------------------------------------|-------------------|---------|-------------------|---------|-------------------|---------|
|                                                         | OR (95% CI)       | P-value | OR (95% CI)       | P-value | OR (95% CI)       | P-value |
| <b>Gender</b>                                           |                   |         |                   |         |                   |         |
| Female                                                  | 1                 | 0.8675  |                   |         |                   |         |
| Male                                                    | 1.05 (0.58, 1.93) |         |                   |         |                   |         |
| <b>Age at BRAF/MEKi start</b>                           |                   |         |                   |         |                   |         |
|                                                         | 1.01 (0.99, 1.03) | 0.3522  |                   |         |                   |         |
| <b>ECOG PS at BRAF/MEKi start</b>                       |                   |         |                   |         |                   |         |
| 0                                                       | 1                 | 0.2214  |                   |         |                   |         |
| >=1                                                     | 1.44 (0.80, 2.57) |         |                   |         |                   |         |
| <b>AJCC staging at BRAF/MEKi start</b>                  |                   |         |                   |         |                   |         |
| III/M1a/M1b                                             | 1                 | 0.0876  | 1                 | 0.9363  |                   |         |
| M1c/M1d                                                 | 1.73 (0.92, 3.25) |         | 0.96 (0.34, 2.74) |         |                   |         |
| <b>Overall Best Response with BRAF/MEKi</b>             |                   |         |                   |         |                   |         |
| CR/PR                                                   | 1                 | 0.5383  |                   |         |                   |         |
| SD/PD                                                   | 1.24 (0.62, 2.50) |         |                   |         |                   |         |
| <b>LDH at BRAF/MEKi start</b>                           |                   |         |                   |         |                   |         |
| UNL                                                     | 1                 | 0.0742  | 1                 | 0.1984  |                   |         |
| >UNL                                                    | 1.73 (0.95, 3.16) |         | 1.69 (0.76, 3.76) |         |                   |         |
| <b>Number of progressive lesions at PD1+/-IPI start</b> |                   |         |                   |         |                   |         |
| 1                                                       | 1                 | 0.1087  | 1                 | 0.1761  |                   |         |
| 2                                                       | 1.60 (0.65, 3.92) |         | 2.46 (0.88, 6.89) |         |                   |         |
| >=3                                                     | 2.16 (1.06, 4.40) |         | 1.93 (0.82, 4.55) |         |                   |         |
| <b>Progressing brain metastases at PD1+/-IPI start</b>  |                   |         |                   |         |                   |         |
| No                                                      | 1                 | 0.0356  | 1                 | 0.4593  | 1                 | 0.0787  |
| Yes                                                     | 1.96 (1.05, 3.67) |         | 1.73 (0.41, 7.35) |         | 1.83 (0.93, 3.60) |         |
| <b>Progressing liver metastases at PD1+/-IPI start</b>  |                   |         |                   |         |                   |         |

| Variable                                                   | Univariate        |         | Multivariable     |         | Predictive Model  |               |
|------------------------------------------------------------|-------------------|---------|-------------------|---------|-------------------|---------------|
|                                                            | OR (95% CI)       | P-value | OR (95% CI)       | P-value | OR (95% CI)       | P-value       |
| No                                                         | 1                 | 0.4278  |                   |         |                   |               |
| Yes                                                        | 1.44 (0.58, 3.56) |         |                   |         |                   |               |
| <b>Any steroids to control symptoms due to progression</b> |                   |         |                   |         |                   |               |
| No                                                         | 1                 | 0.2302  |                   |         |                   |               |
| Yes                                                        | 2.05 (0.63, 6.66) |         |                   |         |                   |               |
| <b>Age at PD1+/-IPI start (years)</b>                      |                   |         |                   |         |                   |               |
|                                                            | 1.01 (0.99, 1.03) | 0.4051  |                   |         |                   |               |
| <b>ECOG at PD1+/-IPI start</b>                             |                   |         |                   |         |                   |               |
| 0                                                          | 1                 | 0.0094  | 1                 | 0.0170  | 1                 | <b>0.0086</b> |
| >=1                                                        | 2.17 (1.21, 3.90) |         | 2.40 (1.17, 4.94) |         | 2.42 (1.25, 4.70) |               |
| <b>BRAF mutation status</b>                                |                   |         |                   |         |                   |               |
| V600E                                                      | 1                 | 0.7408  |                   |         |                   |               |
| Other                                                      | 0.90 (0.47, 1.71) |         |                   |         |                   |               |
| <b>Duration of BRAF/MEKi treatment (months)</b>            |                   |         |                   |         |                   |               |
|                                                            | 0.99 (0.97, 1.01) | 0.3570  |                   |         |                   |               |
| <b>Reason for BRAF/MEKi cessation</b>                      |                   |         |                   |         |                   |               |
| Recurrence/PD                                              | 1                 | 0.0245  | 1                 | 0.5426  |                   |               |
| Elective                                                   | 0.46 (0.24, 0.91) |         | 0.69 (0.21, 2.27) |         |                   |               |
| <b>Interval between BRAF/MEKi and PD1+/-IPI (days)</b>     |                   |         |                   |         |                   |               |
|                                                            | 1.00 (1.00, 1.00) | 0.3342  |                   |         |                   |               |
| <b>AJCC Staging at PD1+/-IPI start</b>                     |                   |         |                   |         |                   |               |
| III/M1a/M1b                                                | 1                 | 0.2039  | 1                 | 0.2765  |                   |               |
| M1c/M1d                                                    | 1.59 (0.78, 3.26) |         | 0.48 (0.13, 1.81) |         |                   |               |
| <b>Brain metastasis at PD1+/-IPI start</b>                 |                   |         |                   |         |                   |               |
| No                                                         | 1                 | 0.1107  | 1                 | 0.5551  |                   |               |
| Yes                                                        | 1.58 (0.90, 2.79) |         | 1.58 (0.35, 7.24) |         |                   |               |
| <b>Lung metastasis at PD1+/-IPI start</b>                  |                   |         |                   |         |                   |               |
| No                                                         | 1                 | 0.4928  |                   |         |                   |               |



| Variable                                          | Univariate        |         | Multivariable     |         | Predictive Model  |               |
|---------------------------------------------------|-------------------|---------|-------------------|---------|-------------------|---------------|
|                                                   | OR (95% CI)       | P-value | OR (95% CI)       | P-value | OR (95% CI)       | P-value       |
| Yes                                               | 0.82 (0.47, 1.45) |         |                   |         |                   |               |
| <b>Liver metastasis at PD1+/-IPI start</b>        |                   |         |                   |         |                   |               |
| No                                                | 1                 | 0.0724  | 1                 | 0.5516  |                   |               |
| Yes                                               | 1.77 (0.95, 3.29) |         | 1.31 (0.54, 3.19) |         |                   |               |
| <b>GI metastasis at PD1+/-IPI start</b>           |                   |         |                   |         |                   |               |
| No                                                | 1                 | 0.9937  |                   |         |                   |               |
| Yes                                               | 1.00 (0.46, 2.18) |         |                   |         |                   |               |
| <b>Bone metastasis at PD1+/-IPI start</b>         |                   |         |                   |         |                   |               |
| No                                                | 1                 | 0.0099  | 1                 | 0.1560  | 1                 | <b>0.0494</b> |
| Yes                                               | 2.32 (1.22, 4.41) |         | 1.93 (0.78, 4.78) |         | 2.13 (1.00, 4.54) |               |
| <b>Adrenal metastasis at PD1+/-IPI start</b>      |                   |         |                   |         |                   |               |
| No                                                | 1                 | 0.1161  | 1                 | 0.7705  |                   |               |
| Yes                                               | 1.95 (0.85, 4.48) |         | 1.17 (0.40, 3.47) |         |                   |               |
| <b>Soft tissue metastasis at PD1+/-IPI start</b>  |                   |         |                   |         |                   |               |
| No                                                | 1                 | 0.3470  |                   |         |                   |               |
| Yes                                               | 1.34 (0.73, 2.48) |         |                   |         |                   |               |
| <b>LN metastasis at PD1+/-IPI start</b>           |                   |         |                   |         |                   |               |
| No                                                | 1                 | 0.7113  |                   |         |                   |               |
| Yes                                               | 0.90 (0.50, 1.61) |         |                   |         |                   |               |
| <b>Spleen metastasis at PD1+/-IPI start</b>       |                   |         |                   |         |                   |               |
| No                                                | 1                 | 0.7042  |                   |         |                   |               |
| Yes                                               | 1.23 (0.43, 3.52) |         |                   |         |                   |               |
| <b>Subcutaneous metastasis at PD1+/-IPI start</b> |                   |         |                   |         |                   |               |
| No                                                | 1                 | 0.3528  |                   |         |                   |               |
| Yes                                               | 0.74 (0.40, 1.39) |         |                   |         |                   |               |
| <b>LDH at PD1+/-IPI start</b>                     |                   |         |                   |         |                   |               |
| UNL                                               | 1                 | 0.0695  | 1                 | 0.3883  |                   |               |
| >UNL                                              | 1.70 (0.96, 3.02) |         | 1.39 (0.66, 2.91) |         |                   |               |
| <b>Treatment</b>                                  |                   |         |                   |         |                   |               |

| Variable | Univariate        |         | Multivariable |         | Predictive Model |         |
|----------|-------------------|---------|---------------|---------|------------------|---------|
|          | OR (95% CI)       | P-value | OR (95% CI)   | P-value | OR (95% CI)      | P-value |
| PD1      | 1                 | 0.7064  |               |         |                  |         |
| IPI+PD1  | 0.90 (0.51, 1.58) |         |               |         |                  |         |

**Supplementary Table 6.** Univariate and Multivariable Logistic Regression to identify the subgroup of long-term survivors (OS > 3 years) with anti-PD1+/-anti-CTLA-4 after BRAF/MEKi.

| Variable                                                | Univariate        |         | Multivariable      |         | Clinical Models |         |
|---------------------------------------------------------|-------------------|---------|--------------------|---------|-----------------|---------|
|                                                         | OR (95% CI)       | P-value | OR (95% CI)        | P-value | OR (95% CI)     | P-value |
| <b>Gender</b>                                           |                   |         |                    |         |                 |         |
| Female                                                  | 1                 | 0.3224  |                    |         |                 |         |
| Male                                                    | 0.69 (0.33, 1.43) |         |                    |         |                 |         |
| <b>Age at BRAF/MEKi start</b>                           |                   |         |                    |         |                 |         |
|                                                         | 0.97 (0.95, 0.99) | 0.0167  |                    |         |                 |         |
| <b>ECOG PS at BRAF/MEKi start</b>                       |                   |         |                    |         |                 |         |
| 0                                                       | 1                 | 0.6306  |                    |         |                 |         |
| >=1                                                     | 0.84 (0.41, 1.71) |         |                    |         |                 |         |
| <b>AJCC staging at BRAF/MEKi start</b>                  |                   |         |                    |         |                 |         |
| III/M1a/M1b                                             | 1                 | 0.0151  | 1                  | 0.8857  |                 |         |
| M1c/M1d                                                 | 0.39 (0.19, 0.84) |         | 0.91 (0.24, 3.40)  |         |                 |         |
| <b>Overall Best Response with BRAF/MEKi</b>             |                   |         |                    |         |                 |         |
| CR/PR                                                   | 1                 | 0.4566  |                    |         |                 |         |
| SD/PD                                                   | 0.71 (0.30, 1.73) |         |                    |         |                 |         |
| <b>LDH at BRAF/MEKi start</b>                           |                   |         |                    |         |                 |         |
| UNL                                                     | 1                 | 0.0386  | 1                  | 0.3930  |                 |         |
| >UNL                                                    | 0.44 (0.20, 0.96) |         | 0.62 (0.20, 1.87)  |         |                 |         |
| <b>Number of progressive lesions at PD1+/-IPI start</b> |                   |         |                    |         |                 |         |
| 1                                                       | 1                 | 0.6257  |                    |         |                 |         |
| 2                                                       | 1.19 (0.41, 3.42) |         |                    |         |                 |         |
| >=3                                                     | 0.76 (0.32, 1.80) |         |                    |         |                 |         |
| <b>Progressing brain metastases at PD1+/-IPI start</b>  |                   |         |                    |         |                 |         |
| No                                                      | 1                 | 0.1349  | 1                  | 0.7650  |                 |         |
| Yes                                                     | 0.56 (0.26, 1.20) |         | 1.38 (0.17, 11.46) |         |                 |         |
| <b>Progressing liver metastases at PD1+/-IPI start</b>  |                   |         |                    |         |                 |         |

| Variable                                                   | Univariate        |         | Multivariable      |         | Clinical Models   |         |
|------------------------------------------------------------|-------------------|---------|--------------------|---------|-------------------|---------|
|                                                            | OR (95% CI)       | P-value | OR (95% CI)        | P-value | OR (95% CI)       | P-value |
| No                                                         | 1                 | 0.1280  | 1                  | 0.5097  |                   |         |
| Yes                                                        | 0.37 (0.10, 1.33) |         | 0.45 (0.04, 4.89)  |         |                   |         |
| <b>Any steroids to control symptoms due to progression</b> |                   |         |                    |         |                   |         |
| No                                                         | 1                 | 0.6464  |                    |         |                   |         |
| Yes                                                        | 0.73 (0.19, 2.80) |         |                    |         |                   |         |
| <b>Age at PD1+/-IPI start (years)</b>                      |                   |         |                    |         |                   |         |
|                                                            | 0.97 (0.95, 1.00) | 0.0265  | 0.98 (0.94, 1.01)  | 0.2170  |                   |         |
| <b>ECOG at PD1+/-IPI start</b>                             |                   |         |                    |         |                   |         |
| 0                                                          | 1                 | 0.0003  | 1                  | 0.0107  | 1                 | <.0001  |
| >=1                                                        | 0.25 (0.12, 0.53) |         | 0.25 (0.09, 0.73)  |         | 0.19 (0.09, 0.44) |         |
| <b>BRAF mutation status</b>                                |                   |         |                    |         |                   |         |
| V600E                                                      | 1                 | 0.1282  | 1                  | 0.0804  |                   |         |
| Other                                                      | 0.49 (0.20, 1.23) |         | 0.30 (0.08, 1.16)  |         |                   |         |
| <b>Duration of BRAF/MEKi treatment (months)</b>            |                   |         |                    |         |                   |         |
|                                                            | 1.05 (1.02, 1.09) | 0.0038  | 1.05 (1.00, 1.11)  | 0.0488  |                   |         |
| <b>Reason for BRAF/MEKi cessation</b>                      |                   |         |                    |         |                   |         |
| Recurrence/PD                                              | 1                 | 0.7504  |                    |         |                   |         |
| Elective                                                   | 1.16 (0.46, 2.90) |         |                    |         |                   |         |
| <b>Interval between BRAF/MEKi and PD1+/-IPI (days)</b>     |                   |         |                    |         |                   |         |
|                                                            | 1.00 (1.00, 1.00) | 0.7170  |                    |         |                   |         |
| <b>AJCC Staging at PD1+/-IPI start</b>                     |                   |         |                    |         |                   |         |
| III/M1a/M1b                                                | 1                 | 0.1155  | 1                  | 0.0658  |                   |         |
| M1c/M1d                                                    | 0.50 (0.21, 1.19) |         | 5.50 (0.89, 33.82) |         |                   |         |
| <b>Brain metastasis at PD1+/-IPI start</b>                 |                   |         |                    |         |                   |         |
| No                                                         | 1                 | 0.1696  | 1                  | 0.0478  |                   |         |
| Yes                                                        | 0.61 (0.30, 1.24) |         | 0.10 (0.01, 0.98)  |         |                   |         |
| <b>Lung metastasis at PD1+/-IPI start</b>                  |                   |         |                    |         |                   |         |
| No                                                         | 1                 | 0.3473  |                    |         |                   |         |
| Yes                                                        | 1.41 (0.69, 2.89) |         |                    |         |                   |         |

| Variable                                          | Univariate        |         | Multivariable     |         | Clinical Models   |               |
|---------------------------------------------------|-------------------|---------|-------------------|---------|-------------------|---------------|
|                                                   | OR (95% CI)       | P-value | OR (95% CI)       | P-value | OR (95% CI)       | P-value       |
| <b>Liver metastasis at PD1+/-IPI start</b>        |                   |         |                   |         |                   |               |
| No                                                | 1                 | 0.0020  | 1                 | 0.0390  | 1                 | <b>0.0005</b> |
| Yes                                               | 0.23 (0.09, 0.58) |         | 0.16 (0.03, 0.91) |         | 0.16 (0.06, 0.45) |               |
| <b>GI metastasis at PD1+/-IPI start</b>           |                   |         |                   |         |                   |               |
| No                                                | 1                 | 0.5448  |                   |         |                   |               |
| Yes                                               | 1.33 (0.53, 3.38) |         |                   |         |                   |               |
| <b>Bone metastasis at PD1+/-IPI start</b>         |                   |         |                   |         |                   |               |
| No                                                | 1                 | 0.0020  | 1                 | 0.0978  |                   |               |
| Yes                                               | 0.23 (0.09, 0.58) |         | 0.29 (0.07, 1.26) |         |                   |               |
| <b>Adrenal metastasis at PD1+/-IPI start</b>      |                   |         |                   |         |                   |               |
| No                                                | 1                 | 0.3864  |                   |         |                   |               |
| Yes                                               | 0.63 (0.22, 1.80) |         |                   |         |                   |               |
| <b>Soft tissue metastasis at PD1+/-IPI start</b>  |                   |         |                   |         |                   |               |
| No                                                | 1                 | 0.9688  |                   |         |                   |               |
| Yes                                               | 0.99 (0.47, 2.08) |         |                   |         |                   |               |
| <b>LN metastasis at PD1+/-IPI start</b>           |                   |         |                   |         |                   |               |
| No                                                | 1                 | 0.6514  |                   |         |                   |               |
| Yes                                               | 0.84 (0.40, 1.77) |         |                   |         |                   |               |
| <b>Spleen metastasis at PD1+/-IPI start</b>       |                   |         |                   |         |                   |               |
| No                                                | 1                 | 0.2952  |                   |         |                   |               |
| Yes                                               | 0.44 (0.09, 2.06) |         |                   |         |                   |               |
| <b>Subcutaneous metastasis at PD1+/-IPI start</b> |                   |         |                   |         |                   |               |
| No                                                | 1                 | 0.2565  |                   |         |                   |               |
| Yes                                               | 0.62 (0.27, 1.42) |         |                   |         |                   |               |
| <b>LDH at PD1+/-IPI start</b>                     |                   |         |                   |         |                   |               |
| UNL                                               | 1                 | 0.0009  | 1                 | 0.2383  |                   |               |
| >UNL                                              | 0.27 (0.13, 0.59) |         | 0.54 (0.19, 1.51) |         |                   |               |
| <b>Treatment</b>                                  |                   |         |                   |         |                   |               |
| PD1                                               | 1                 | 0.8952  |                   |         |                   |               |

| Variable | Univariate        |         | Multivariable |         | Clinical Models |         |
|----------|-------------------|---------|---------------|---------|-----------------|---------|
|          | OR (95% CI)       | P-value | OR (95% CI)   | P-value | OR (95% CI)     | P-value |
| IPI+PD1  | 0.95 (0.46, 1.96) |         |               |         |                 |         |

**Supplementary Table 7.** Proportion of any grade immune-related adverse events (AE) by treatment type.

| Any grade immune-related adverse events | Anti-PD1 (n=115) |        |          | Anti-PD1 + anti-CTLA-4 (n=85) |          |          |
|-----------------------------------------|------------------|--------|----------|-------------------------------|----------|----------|
|                                         | < G3             | ≥ G3   | Any      | < G3                          | ≥ G3     | Any      |
| Diarrhea/colitis (n, %)                 | 9 (8%)           | 0      | 9 (8%)   | 9 (11%)                       | 13 (15%) | 22 (26%) |
| Hepatitis (n, %)                        | 2 (2%)           | 3 (3%) | 5 (4%)   | 8 (9%)                        | 9 (11%)  | 17 (20%) |
| Skin toxicity (n, %)                    | 16 (14%)         | 0      | 16 (14%) | 19 (22%)                      | 1 (1%)   | 20 (24%) |
| Hypophysitis, thyroiditis (n, %)        | 8 (7%)           | 0      | 8 (7%)   | 11 (13%)                      | 1 (1%)   | 12 (14%) |
| Pneumonitis                             | 4 (3%)           | 1 (1%) | 5 (4%)   | 3 (4%)                        | 0        | 3 (4%)   |
| Nephritis (n, %)                        | 1 (1%)           | 0      | 1 (1%)   | 0                             | 1 (1%)   | 1 (1%)   |
| Pyrexia (n, %)                          | 5 (4%)           | 0      | 5 (4%)   | 2 (2%)                        | 1 (1%)   | 3 (4%)   |
| Arthritis/myalgias (n, %)               | 12 (10%)         | 0      | 12 (10%) | 2 (2%)                        | 0        | 2 (2%)   |
| Others (n, %)                           | 10 (9%)          | 2 (2%) | 12 (10%) | 8 (9%)                        | 5 (6%)   | 13 (15%) |

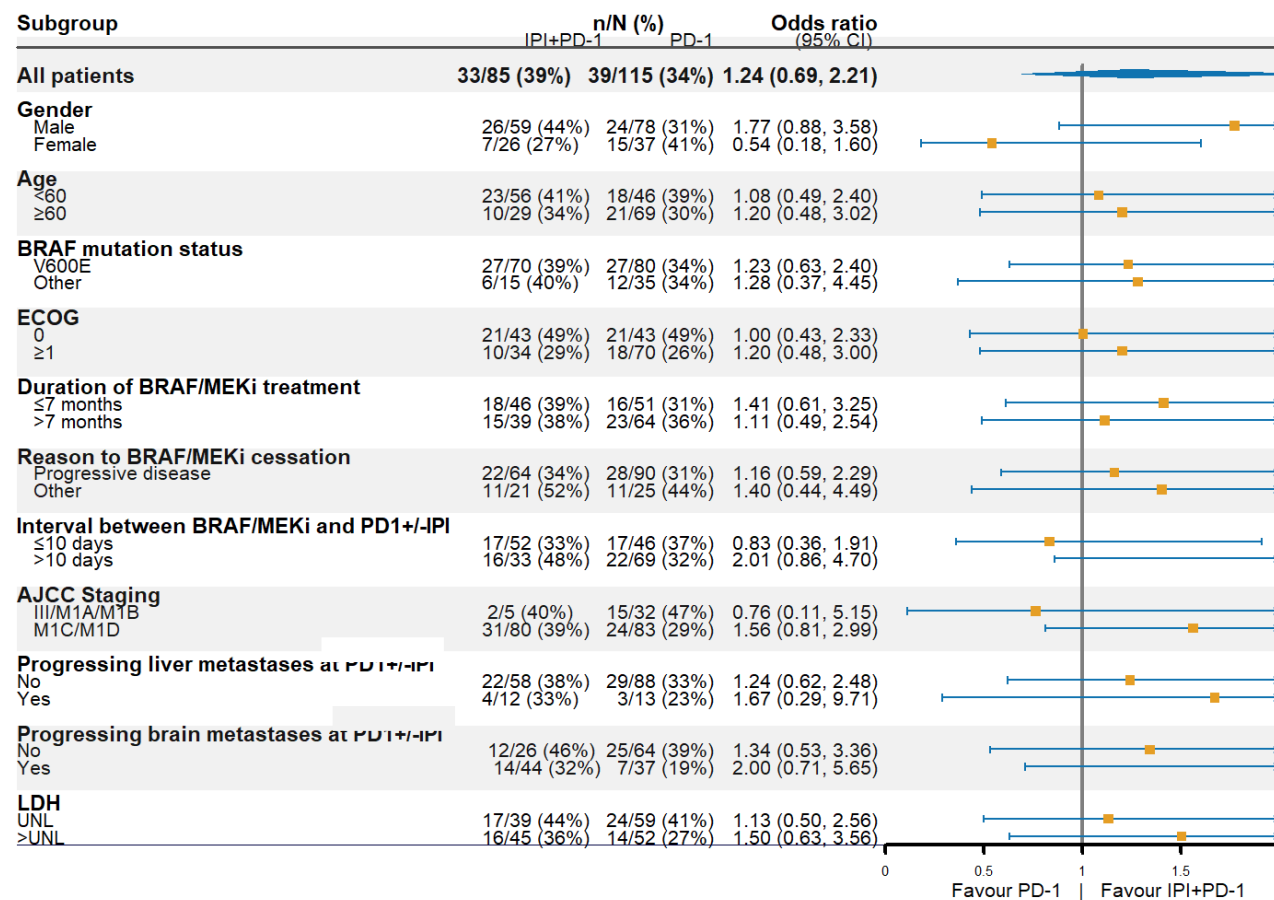

Supplementary Figure 1. Forest plot showing the objective response subgroup analysis.



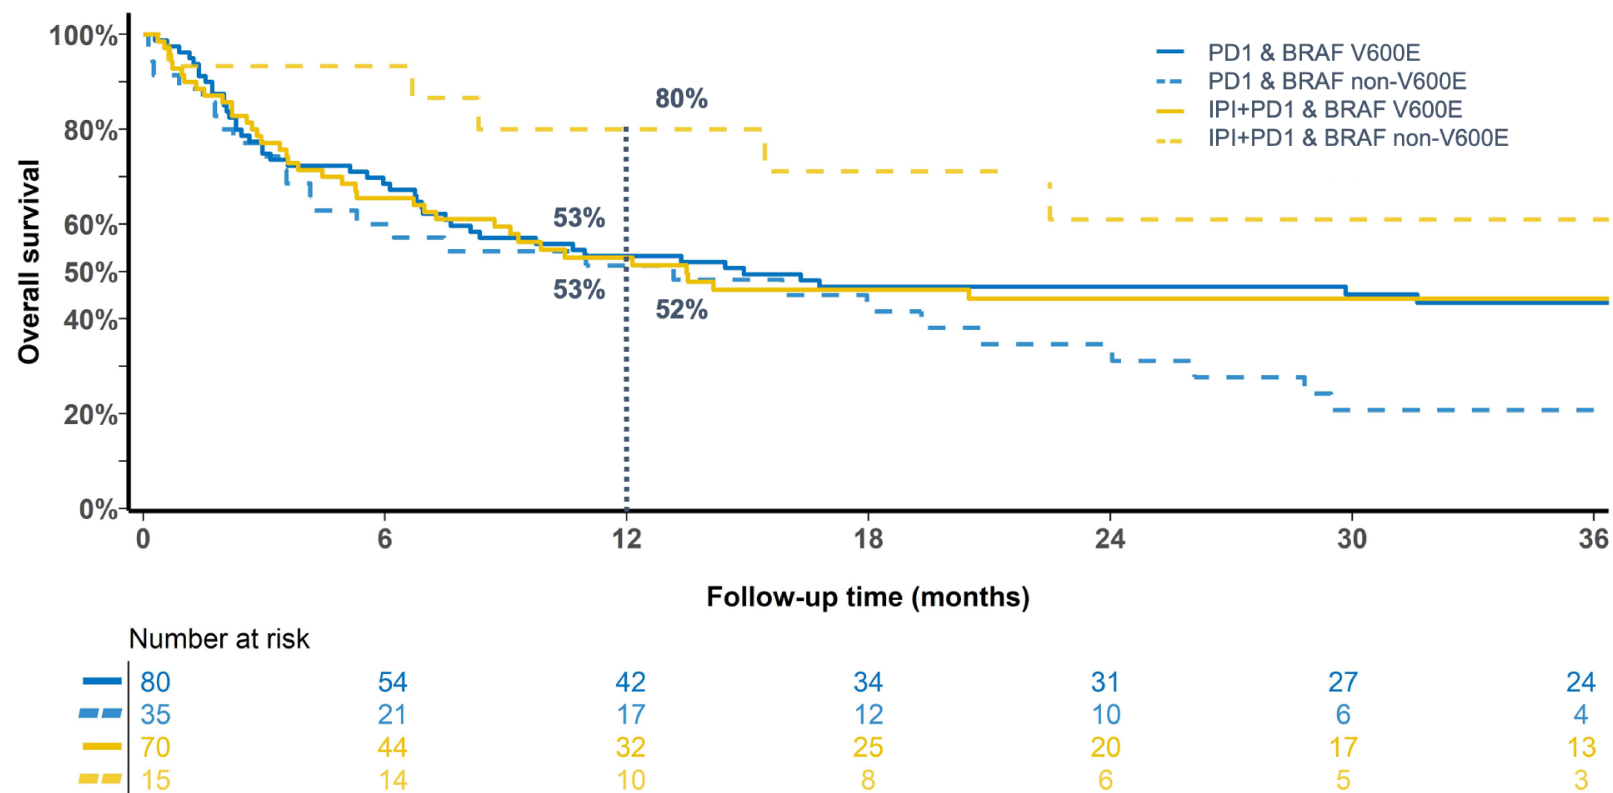

**Supplementary Figure 2.** Kaplan Meier curves showing overall survival stratified by treatment (PD1 vs IPI+PD1) and BRAF mutation type (V600E vs non-V600E).

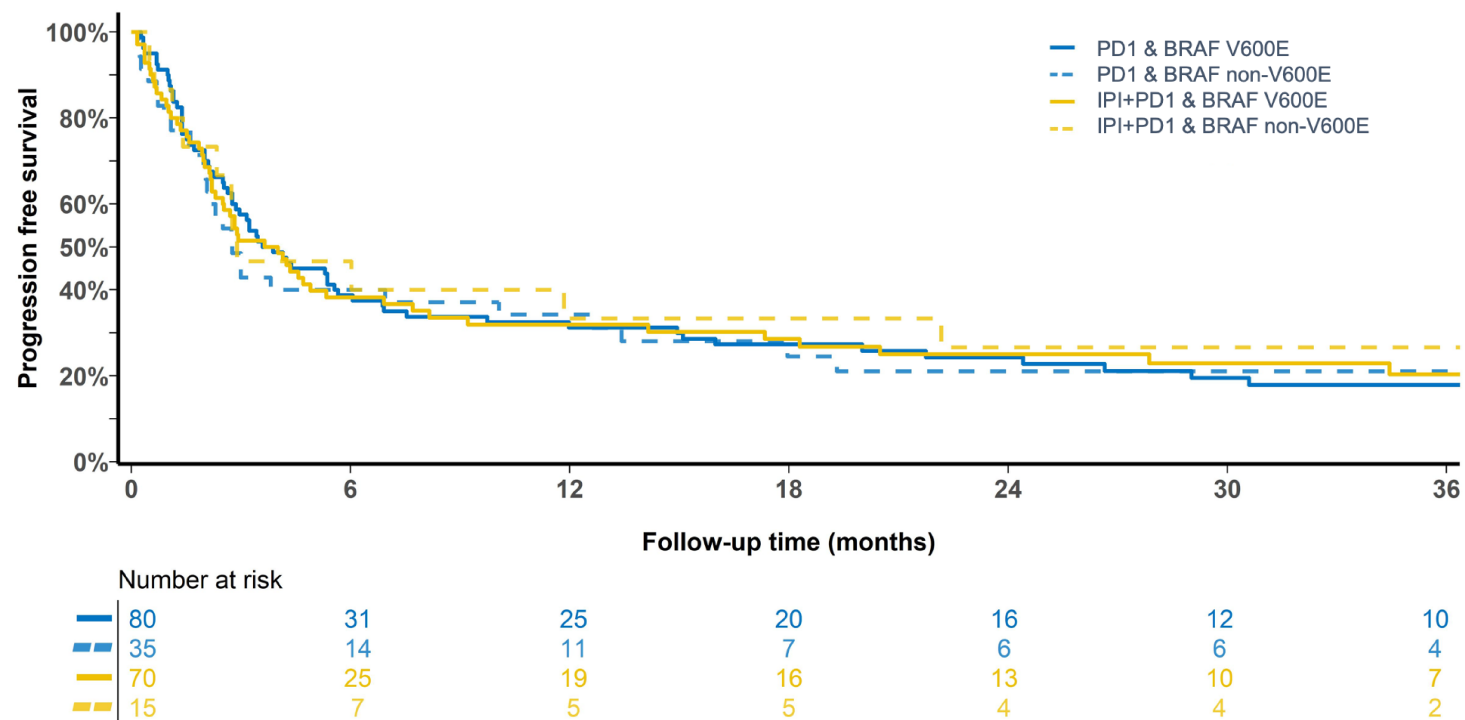

**Supplementary Figure 3.** Kaplan Meier curves showing progression-free survival stratified by treatment (PD1 vs IPI+PD1) and BRAF mutation type (V600E vs non-V600E).

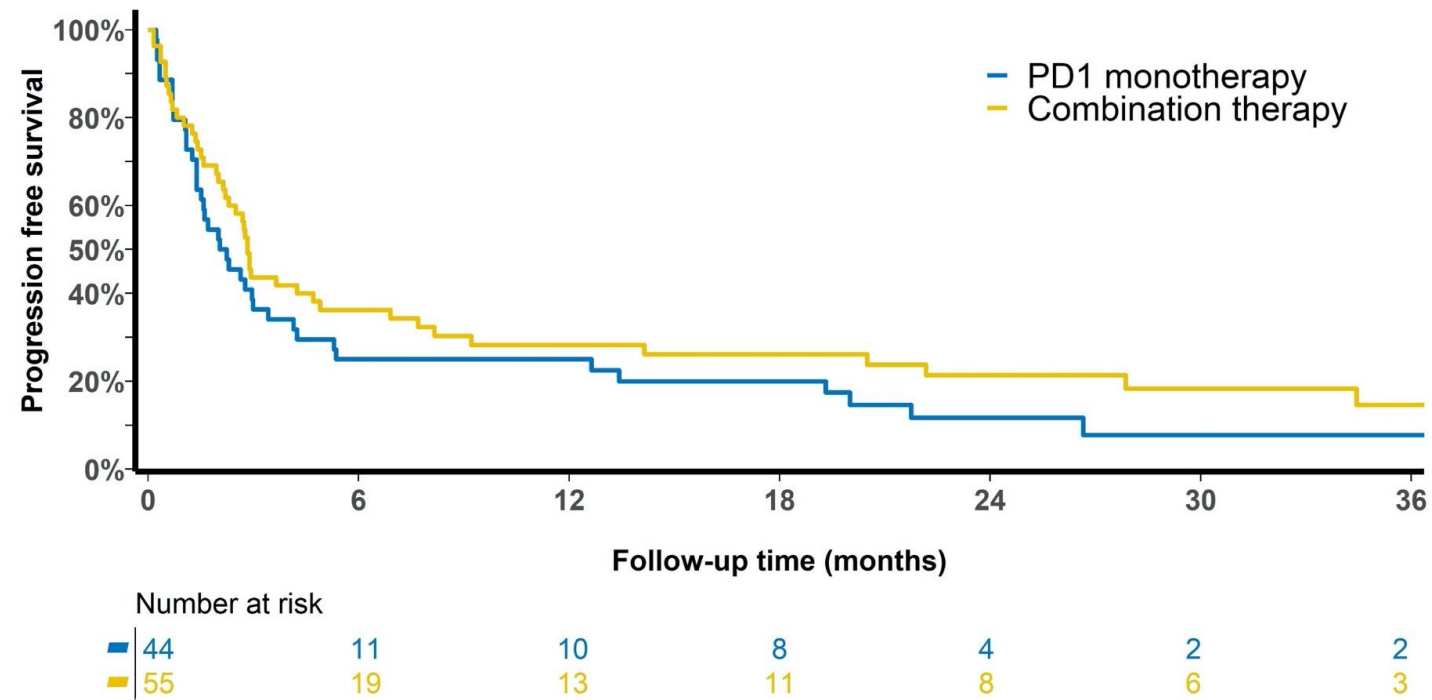

**Supplementary Figure 4.** Kaplan Meier curves showing progression-free survival for the subgroup of patients with brain metastases stratified by treatment (PD1 vs IPI+PD1).

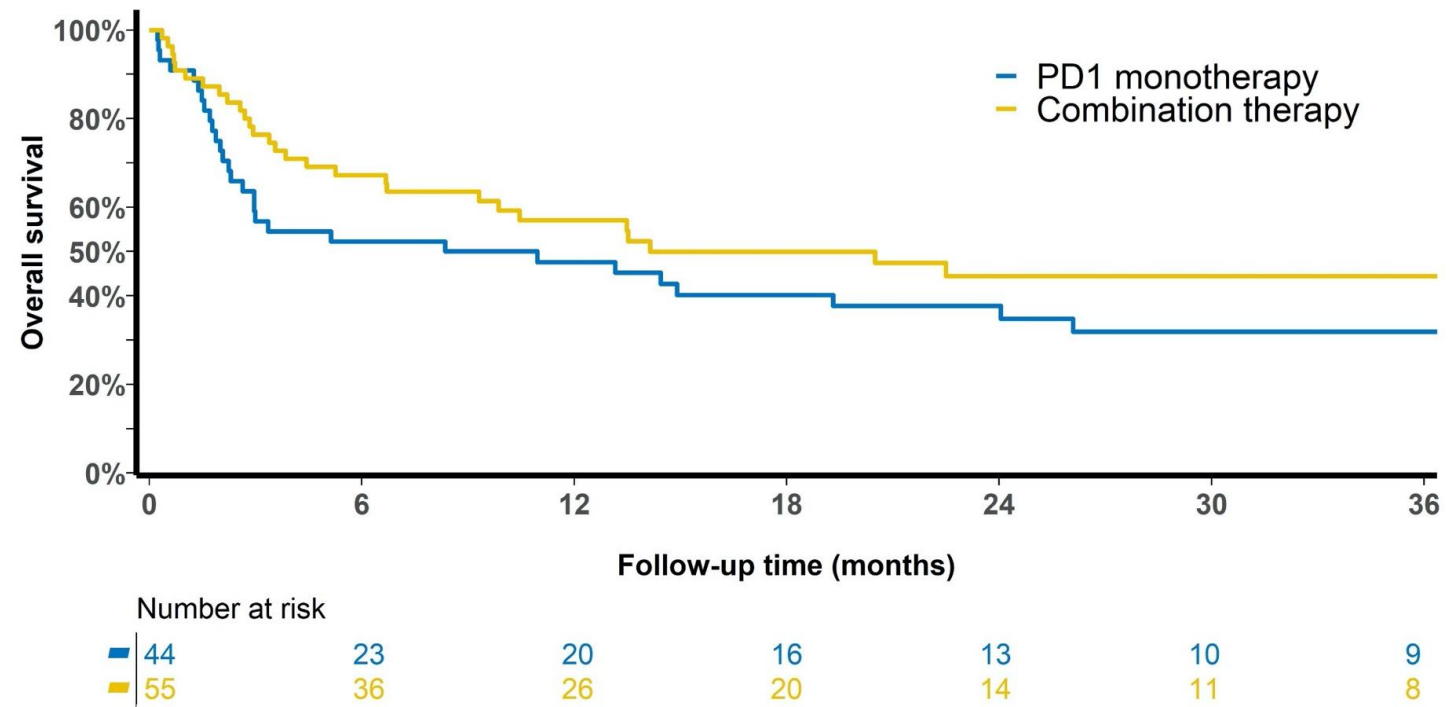

**Supplementary Figure 5.** Kaplan Meier curves showing overall survival for the subgroup of patients with brain metastases stratified by treatment (PD1 vs IPI+PD1).
